# Supplementary material for: NDRG4 Alleviates Myocardial Infarction-Induced Apoptosis through the JAK2/STAT3 Pathway
Source: Hindawi journal article supplement (doi:10.1155/2022/4869470), 2022-01-27
Supplement: f1 [file 4869470.f1.docx]

**Supplementally Table 1** Antibody information

| Antibody | Manufacturers | Source | Concentration |  |
| --- | --- | --- | --- | --- |
| Bax | Abcam, Cambridge, MA, USA | Rabbit | 1:2000 |  |
| Bcl-2  Bcl-XL  AKT2  p-AKT2  STAT3  p-STAT3 | Abcam, Cambridge, MA, USA  Abcam, Cambridge, MA, USA  Abcam, Cambridge, MA, USA  Abcam, Cambridge, MA, USA  Abcam, Cambridge, MA, USA  Abcam, Cambridge, MA, USA | Rabbit  Rabbit  Mouse  Rabbit  Rabbit  Rabbit | 1:2000  1:1000  1:3000  1:1000  1:2000  1:1000 |  |
| GAPDH | Proteintech, Rosemont, IL, USA | Mouse | 1:3000 |  |
