# Supplementary material for: NDRG4 Alleviates Myocardial Infarction-Induced Apoptosis through the JAK2/STAT3 Pathway
Source: Hindawi journal article supplement (doi:10.1155/2022/4869470), 2022-01-27
Supplement: f2 [file 4869470.f2.docx]

**Supplementally Table 2** real time PCR primers

| Gene name | Forward (5'>3') | Reverse (5'>3') | fragment size (F/R) |  |
| --- | --- | --- | --- | --- |
| Bax (ID:24887) | GAGGTCTTCTTCCGTGTGG | GATCAGCTCGGGCACTTT | 19/18 |  |
| Bcl-2 (ID:24224)  Bcl-XL (ID:24888)  NDRG1 (ID:299923)  NDRG2 (ID:171114)  NDRG3 (ID:296318)  NDRG4 (ID:64457) | GGGGAAACACCAGAATCA  ACCCCTCTTCCCTCCAG  TACATCCTGACCCGCTTT  GGACCAGGGACAGACTCA  GAAGTGCCTCCTGGTCTG  CTGGGCAGGACATGATAGA | GGCCCGAAAGAGAGAAA  CCTCAGCCAACTCTACGC  CACCACCTCCACATTGC  ACAGTGGCTGGAAGCAAG  TGTGCTAACGGTCCTTCC  CAACGGGGACAAGAGAGA | 18/17  17/18  18/17  18/18  18/18  19/18 |  |
| GAPDH (ID:24383) | CAAGAAGGTGGTGAAGCAG | CAAAGGTGGAAGAATGGG | 19/18 |  |
| qRT-PCR, quantitative reverse-transcription polymerase chain reaction | | |  |  |
